# Supplementary material
Source: publisher figshare collection journal article supplement (https://karger.figshare.com/articles/dataset/_/4254032)
Supplement: Supplementary file 1 [file 1]

## **PRECUNEAL THICKNESS AND DEPRESSION IN PARKINSON'S DISEASE**

### **Collaborators:**

Sabina Capellari<sup>1,2</sup>, MD (patients' recruitment), Giulia Giannini<sup>1,2</sup>, MD (patients' recruitment), Pietro Guaraldi<sup>3</sup>, MD, PhD (patients' recruitment), Paolo Martinelli<sup>2</sup>, MD (patients' recruitment), Stefania Nasseti<sup>1</sup>, MD, PhD (patients' recruitment), Cesa Scaglione<sup>1</sup>, MD, PhD (patients' recruitment), Rossana Terlizzi<sup>1,2</sup>, MD (patients' recruitment), Roberto Gallassi<sup>4</sup>, MD (Neuropsychology), Michelangelo Stanzani-Maserati<sup>1</sup>, MD, PhD (Neuropsychology), Annagrazia Cecere<sup>1</sup>, MSc (sleep laboratory), Federica Provini<sup>1,2</sup>, MD, PhD (sleep), Giorgio Barletta<sup>1,2</sup>, MSc (autonomic nervous system laboratory), Giulia Pierangeli<sup>1,2</sup>, MD, PhD (autonomic nervous system laboratory), Laura Solieri<sup>1,2</sup>, BSc (autonomic nervous system laboratory), Manuela Contin<sup>1,2</sup>, PharmD (pharmacology), Giovanna Lopane<sup>1</sup>, MD (pharmacology), Carmina Candela<sup>1,2</sup>, BSc (pharmacology).

### *Affiliations:*

<sup>1</sup>IRCCS, Institute of Neurological Sciences of Bologna, Ospedale Bellaria, Via Altura 3, 40139 Bologna, Italy

<sup>2</sup>Department of Biomedical and Neuromotor Sciences, University of Bologna, Via Ugo Foscolo 7, 40123 Bologna, Italy

<sup>3</sup>Neurology Outpatient Clinic, Department of Primary Care, Local Health Authority of Modena, Modena, Italy

<sup>4</sup>Casa di Cura Madre Fortunata Toniolo, Via Toscana 34, Bologna 40141, Italy
